# Supplementary material
Source: Springer Nature journal article supplement (https://www.springermedizin.de/resource/supplementary/12906_2007_196_MOESM3_ESM.pdf/9524250)

3a

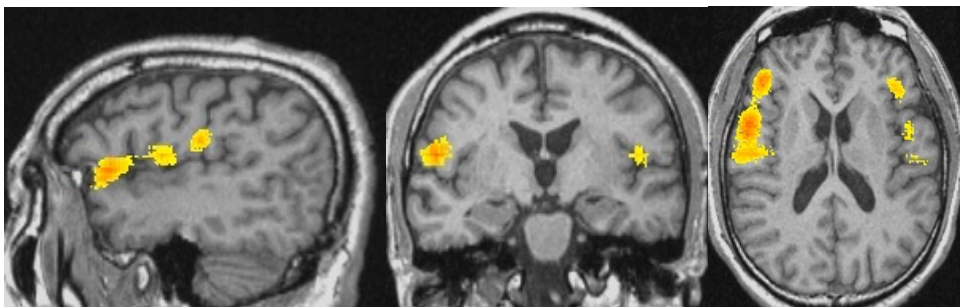

3b

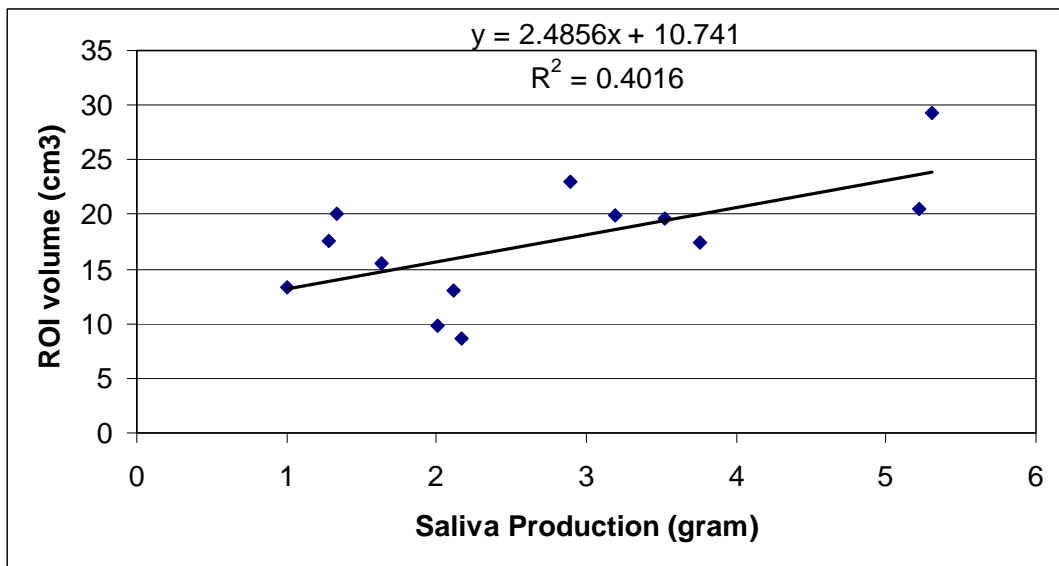

Supplement: MOESM3 [file 9524250]
